# Supplementary material for: Homogeneous and heterogenized Au(iii) Schiff base-complexes as selective and general catalysts for self-coupling of aryl boronic acids
Source: Royal Society of Chemistry journal article supplement (doi:10.1039/b418897g), 2005-01-01
Supplement: b418897g.pdf [file b418897g.pdf]

## Supplementary Material

### 1. Characterization of the gold complexes

**[Au(2)Cl]Cl (2Au):** Yield: >70%. m.p: 98-100 °C.  $\Lambda_M = 129 \Omega^{-1}\text{cm}^2\text{mol}^{-1}$ .  
 $\text{C}_{24}\text{H}_{31}\text{N}_2\text{OCl}_2\text{Au}$ : calcd. C: 45.65; H: 4.95; N: 4.44; Au: 31.20; found C: 45.20; H: 5.03; N: 4.04; Au: 32.09 %. IR (KBr,  $\text{cm}^{-1}$ ):  $\nu = 1610$  (C=N).  $^1\text{H-NMR}$  ( $\text{CDCl}_3$ , ppm):  $\delta = 8.81$ -7.98 (6H, m,  $\text{H}_{\text{arom}}$ ); 7.88-7.29 (4H, m,  $3\text{H}_{\text{arom}}$ , CH=N); 5.23-5.17 (1H, m,  $\text{CH}_2\text{Ph}$ ); 4.80-4.64 (1H, m,  $\text{CH}_2\text{Ph}$ ); 2.31-2.22 (5H, m,  $\text{CH}_3$ ,  $\text{H}_4$ ,  $\text{H}_3'$ ); 2.06-1.92 (1H, m,  $\text{H}_4'$ ); 1.41-1.36 (9H, m,  $\text{C}(\text{CH}_3)_3$ ). EM (m/z): 596 ( $[(2)\text{AuCl}]^+$ ).

**[Au(3)Cl]Cl (3Au):** Yield: >70%. m.p: 130-132 °C.  $\Lambda_M = 118 \Omega^{-1}\text{cm}^2\text{mol}^{-1}$ .  
 $\text{C}_{28}\text{H}_{33}\text{N}_2\text{OCl}_2\text{Au}$ : calcd. C: 49.3; H: 4.9; N: 4.1; Au: 28.9. found C: 49.00; H: 5.03; N: 4.04; Au: 29.3 %. IR (KBr,  $\text{cm}^{-1}$ ):  $\nu = 1608$  (C=N).  $^1\text{H-NMR}$  ( $\text{CDCl}_3$ , ppm):  $\delta = 8.27$ -8.10 (m,  $\text{H}_{\text{arom}}$ ); 7.90-7.77 (m,  $\text{H}_{\text{arom}}$ , CH=N); 7.60-7.38 (m,  $\text{H}_{\text{arom}}$ ); 7.12-7.02 (m,  $\text{H}_{\text{arom}}$ ); 6.72-6.66 (m,  $\text{H}_{\text{arom}}$ ); 5.20, 4.95 (d,  $J_{\text{AB}} = 16$  Hz,  $\text{CH}_{2\text{naphthyl}}$ ); 3.77-3.37 (m,  $\text{H}_{5'a}$ , CH=NCH<sub>2</sub>); 3.22-2.76 (m,  $\text{H}_{2'}$ , CH=NCH<sub>2</sub>); 2.17-2.05 (m,  $\text{H}_{5'b}$ ,  $\text{CH}_3$ ); 1.93-1.47 (m,  $\text{H}_{3'a,b}$ ,  $\text{H}_{4'a,b}$ ); 1.34-1.21 (s,  $\text{C}(\text{CH}_3)_3$ ). EM (m/z): 646 ( $[(3)\text{AuCl}]^+$ ).

**[Au(4)Cl]Cl (4Au):** Yield: >65 %. m.p.: 135-137 °C.  $\Lambda_M = 117 \Omega^{-1}\text{cm}^2\text{mol}^{-1}$ .  
 $\text{C}_{28}\text{H}_{33}\text{N}_2\text{OCl}_2\text{Au}$ : calcd. C: 49.3; H: 4.9; N: 4.1; Au: 28.9. found C: 48.90; H: 5.13; N: 4.64; Au: 29.6 %. IR (KBr,  $\text{cm}^{-1}$ ):  $\nu = 1615$  (C=N).  $^1\text{H-NMR}$  ( $\text{CDCl}_3$ , ppm):  $\delta = 8.10$ -8.03 (m,  $\text{H}_{\text{arom}}$ ); 8.00-7.96 (m, CH=N); 7.85-7.75 (m,  $4\text{H}_{\text{arom}}$ ); 7.50-7.38 (m,  $2\text{H}_{\text{arom}}$ ); 7.18-7.16 (m,  $\text{H}_{\text{arom}}$ ); 7.07-7.02 (m,  $\text{H}_{\text{arom}}$ ); 4.95, 4.26 (d,  $J_{\text{AB}} = 13.8$  Hz,  $\text{CH}_{2\text{naphthyl}}$ ); 3.60-3.37 (m,  $\text{H}_{5'a}$ , CHN=CH<sub>2</sub>); 3.24-3.15 (m, CH=NCH<sub>2</sub>); 2.83-2.71 (m,  $\text{H}_2$ ); 2.58-

2.42 (m, H<sub>5'b</sub>); 2.17-2.04 (s, CH<sub>3</sub>); 1.97-1.83 (m, H<sub>3'a,b</sub>, H<sub>4'a,b</sub>); 1.40-1.25 (s, C(CH<sub>3</sub>)<sub>3</sub>).

EM (m/z): 646 ([**(4)**AuCl]<sup>+</sup>).

**[Au(5)Cl]Cl (5Au)**: Black brown. Yield: 65%. M.p.: >230 °C. (C<sub>32</sub>H<sub>29</sub>N<sub>2</sub>OCl<sub>2</sub>Au): calcd.: C: 52.9; H: 4.0; N: 3.9; Au: 27.1. Found.: C: 52.6; H: 3.8; N: 3.7; Au: 26.9 %. IR (KBr, cm<sup>-1</sup>):  $\nu$  = 1615 (C=N). UV-vis: 482, 345, 328, 230. <sup>1</sup>H-RMN (CD<sub>3</sub>Cl, ppm):  $\delta$  = 7.89-6.37 (16H, m, 15H<sub>arom</sub>, CH=N); 1.96 (3H, s, CH<sub>3</sub>); 1.20 (9H, s, C(CH<sub>3</sub>)<sub>3</sub>). <sup>13</sup>C-RMN (CD<sub>3</sub>Cl, ppm):  $\delta$  = 167.34 (C-O-Au); 156.00 (CH=N); 135.46, 134.96, 134.53, 133.52, 132.87, 132.35, 131.54, 131.32, 130.63 (C<sub>arom</sub>); 35.22 (C(CH<sub>3</sub>)<sub>3</sub>); 30.04 (C(CH<sub>3</sub>)<sub>3</sub>); 20.00 (CH<sub>3</sub>). EM (m/z): 655 ([**(5)**Au<sup>2+</sup>])

**[Au(6)]Cl (6Au)**: Black. Yield: >60 %. m.p.: >230 °C. C<sub>44</sub>H<sub>42</sub>N<sub>2</sub>O<sub>2</sub>ClAu: calcd. 61.2; H: 4.9; N: 3.2; Au: 22.8. found C: 61.0; H: 4.6; N: 3.4; Au: 22.6 %. IR (KBr, cm<sup>-1</sup>):  $\nu$  = 1638 (C=N); 555 (Au-O). H-NMR (CDCl<sub>3</sub>, ppm):  $\delta$  = 8.01-7.15 (16H, m, H<sub>arom</sub>); 2.00 (3H, s, CH<sub>3</sub>); 1.25 (9H, s, C(CH<sub>3</sub>)<sub>3</sub>). <sup>13</sup>C-RMN (CD<sub>3</sub>OD, ppm):  $\delta$  = 162.41 (C-O-Au); 159.98 (CH=N); 123.19, 119.35, 112.44 (C<sub>arom</sub>); 29.72 (C(CH<sub>3</sub>)<sub>3</sub>); 20.34 (CH<sub>3</sub>). EM (m/z): 654 ([M-Cl<sub>aldehyde</sub>])

**[Au(7)]Cl (7Au)**: Brick, Yield: >65 %. m.p.: > 200 °C.  $\Lambda_M = 109 \Omega^{-1}\text{cm}^2\text{mol}^{-1}$ . C<sub>30</sub>H<sub>40</sub>N<sub>2</sub>O<sub>2</sub>ClAu: calcd. 50.0; H: 5.8; N: 4.0; Au: 28.4. found C: 50.4; H: 5.4; N: 4.4; Au: 28.6 %. IR (KBr, cm<sup>-1</sup>):  $\nu$  = 1636 (C=N); 558 (Au-O). H-NMR (CDCl<sub>3</sub>, ppm):  $\delta$  = 8.40-8.17 (m, CH=N); 7.60-7.17 (4H, m, H<sub>arom</sub>); 4.16-4.09 (m, CH<sub>2</sub>N); 3.53-3.42 (m, CH<sub>2</sub>N); 2.00 (3H, s, CH<sub>3</sub>); 1.25 (9H, s, C(CH<sub>3</sub>)<sub>3</sub>). <sup>13</sup>C-RMN (CD<sub>3</sub>OD, ppm):  $\delta$  = 167.41 (C-O-Au); 160.00 (CH=N); 139.97 (C<sub>arom</sub>); 30.17 (C(CH<sub>3</sub>)<sub>3</sub>); 22.97 (CH<sub>3</sub>). EM (m/z): 693 ([**(7)**AuCl]).

## Supplemental Material

### 2. FTIR, DTTR and $^{13}\text{C}$ NMR spectra of 7Au-7Au-(MCM-41) catalyst.

#### Supplementary Material UV-vis (DFTR) and FTIR spectra for complexes 7Au and 7Au-(MCM-41)

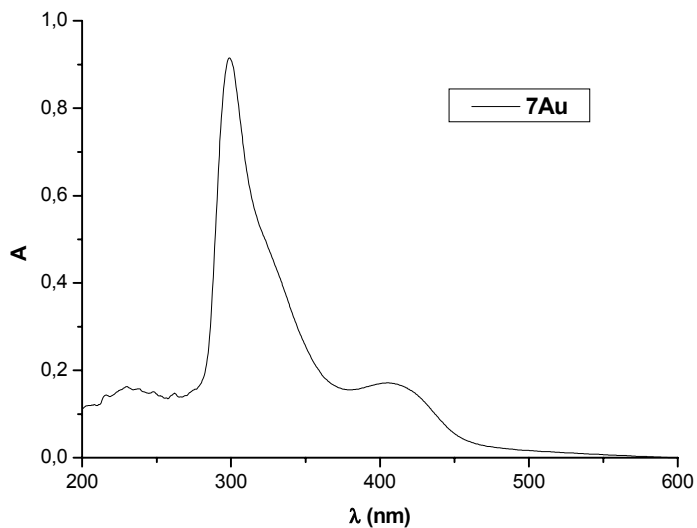

UV-vis spectrum for 7Au

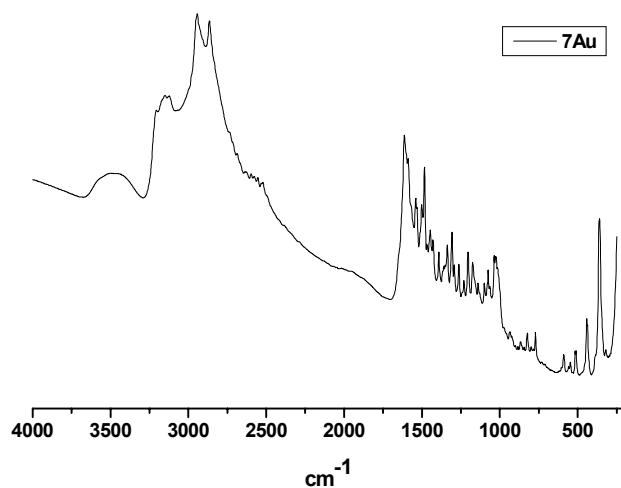

FT-IR spectrum for 7Au

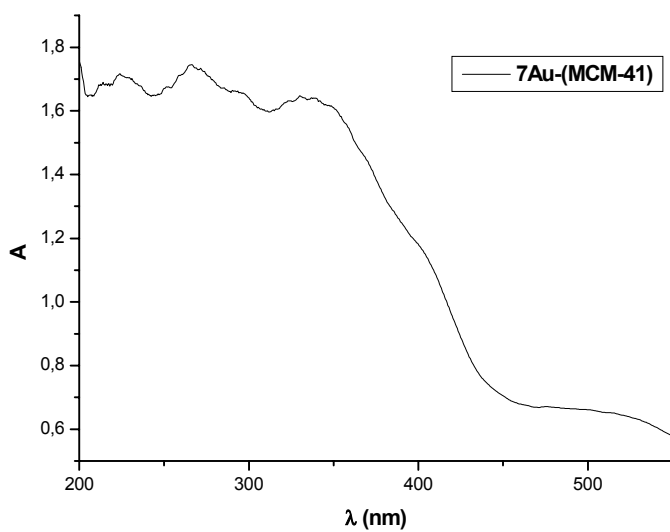

Reflectance diffuse spectrum for **7Au-(MCM-41)**

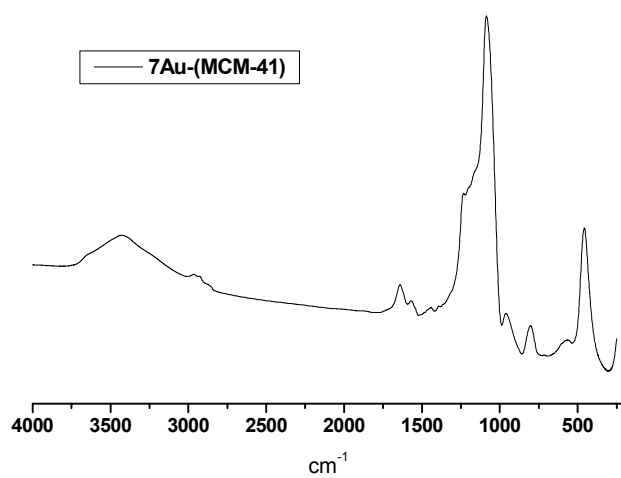

FT-IR spectrum for **7Au-(MCM-41)**

**Supplemental Material**

**$^{13}\text{C}$  NMR of 7 Au and 7Au- (MCM-41) complex**

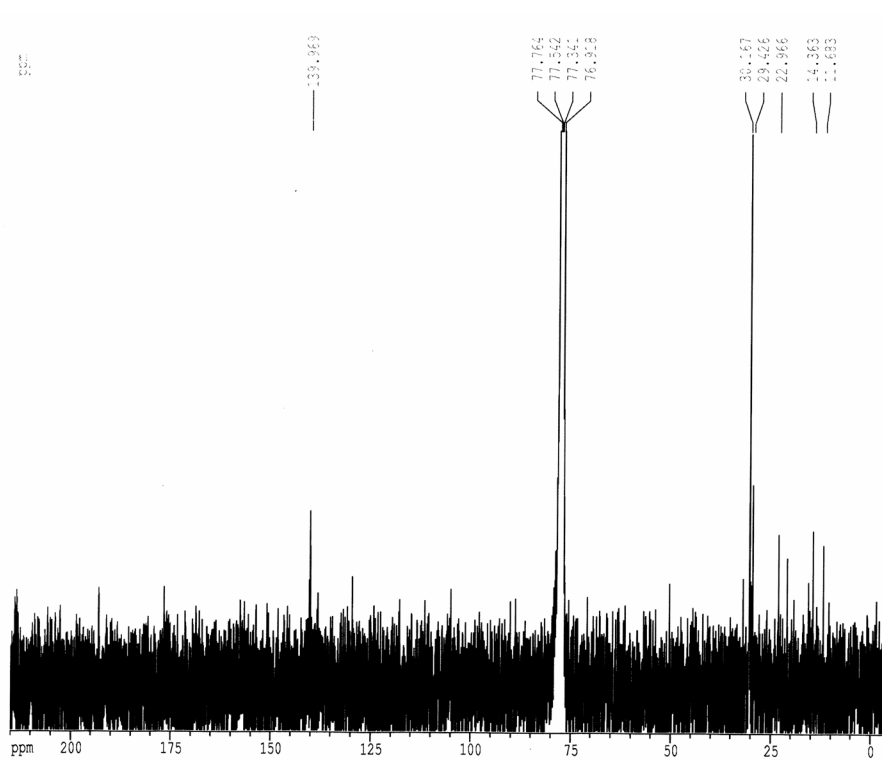

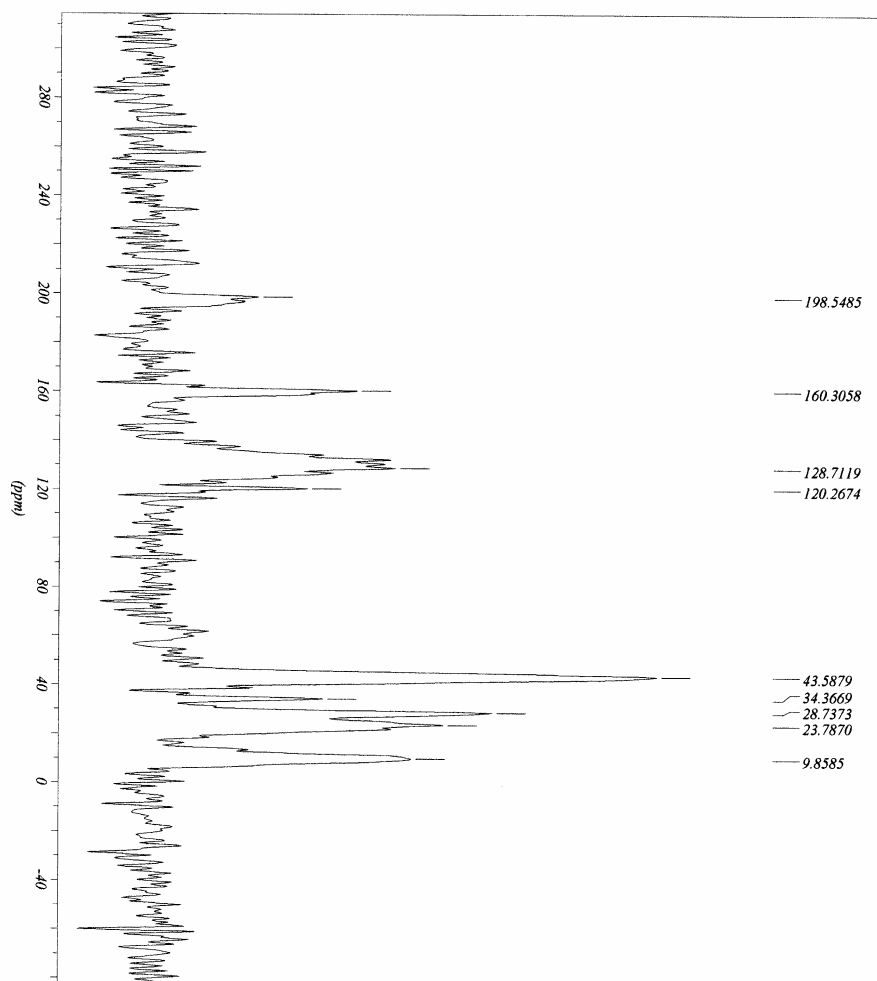

$^{13}\text{C}$  NMR spectrum for 7Au-(MCM-41)
